# Supplementary material for: TMEM97/Sigma 2 Receptor Increases Estrogen Receptor <em>α</em> Activity in Promoting Breast Cancer Cell Growth
Source: Preprints.org preprint supplement (doi:10.20944/preprints202311.0851.v1), 2023-11-14
Supplement: Supplementary file 3 [file supplementary]

TMEM97/Sigma 2 Receptor Increases Estrogen Receptor  Activity in Promoting Breast Cancer Cell Growth

Yuanqin Zhang, Xiangwei Fang, Jiuhui Wang and Daotai Nie


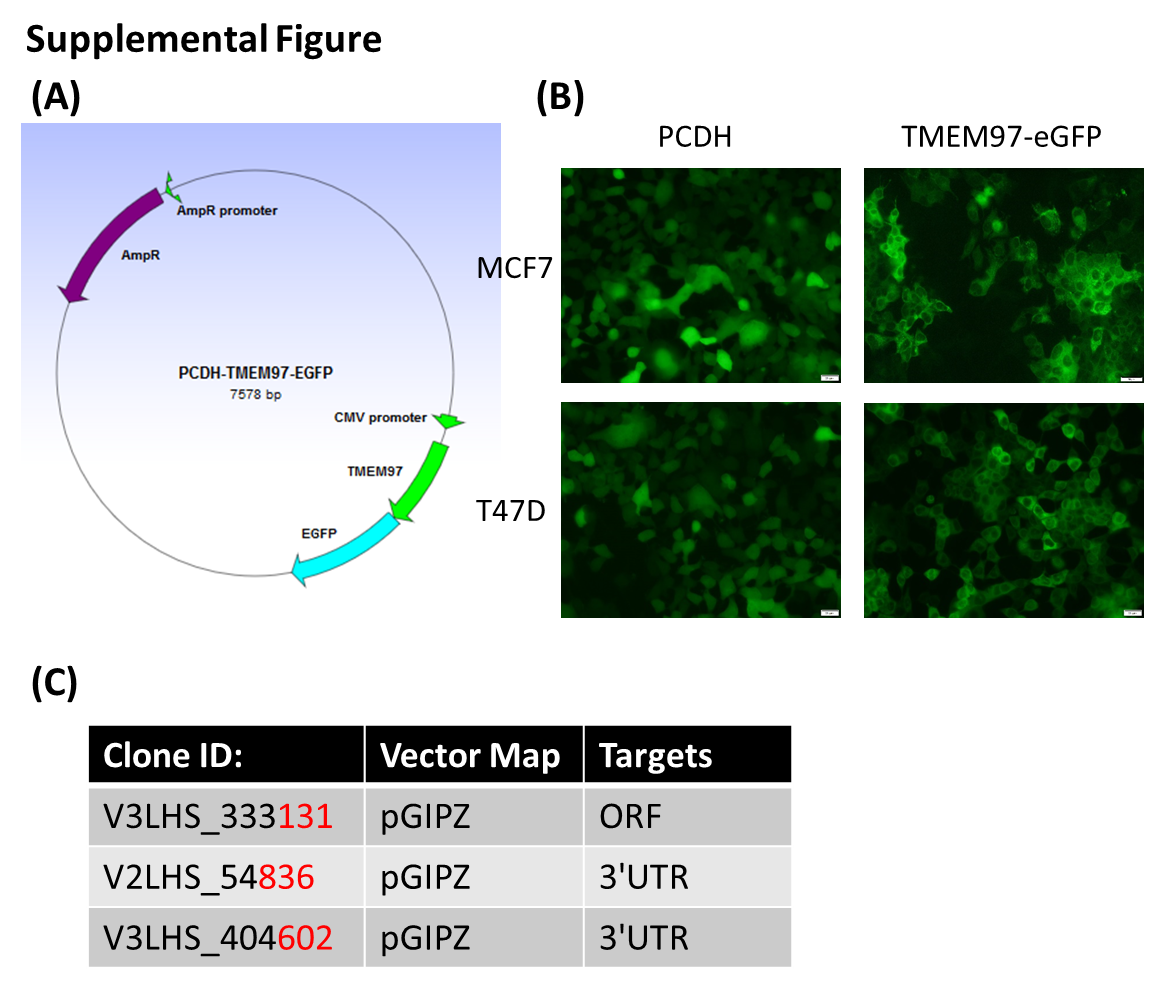


**Supplemental Figure.**

(**A**). The plasmid map of TMEM97-EGFP on PCDH-CMV vector to generate TMEM97 stable overexpression breast cancer cells.

**(B).** Visualization of TMEM97eGFP cells in MCF7 and T47D compared to vector control.

**(C).** Commercial modified miR-30 based GIPZ Lentiviral shRNA used for TMEM97 knockdown.


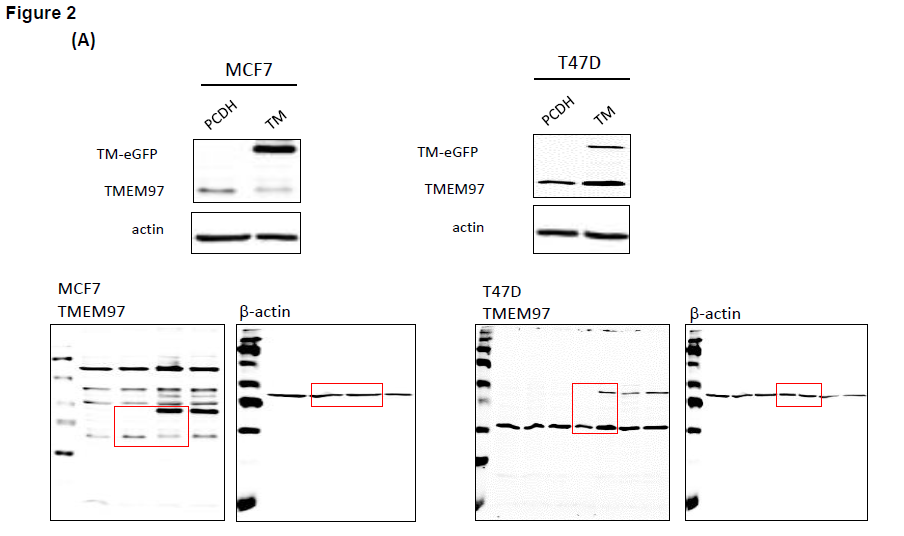


Original blots of Figure 2.


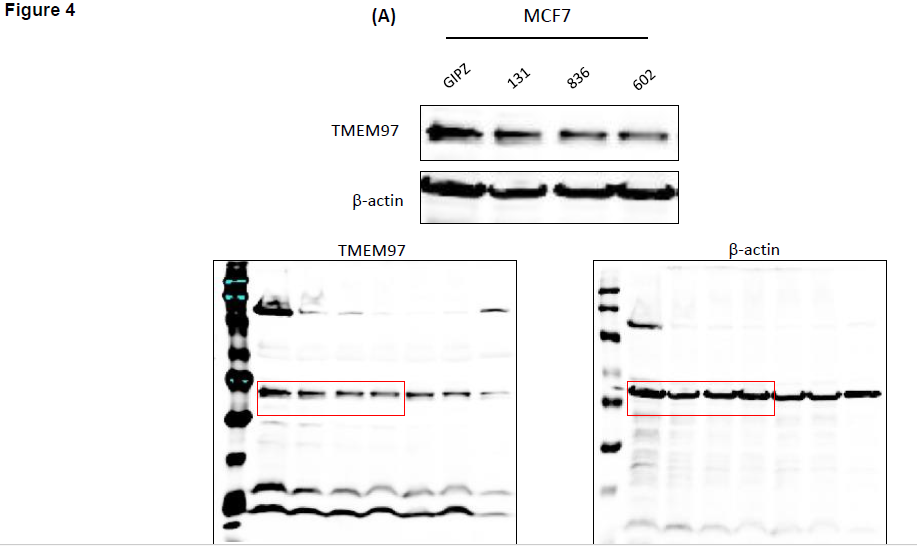


Original blots of Figure 4.


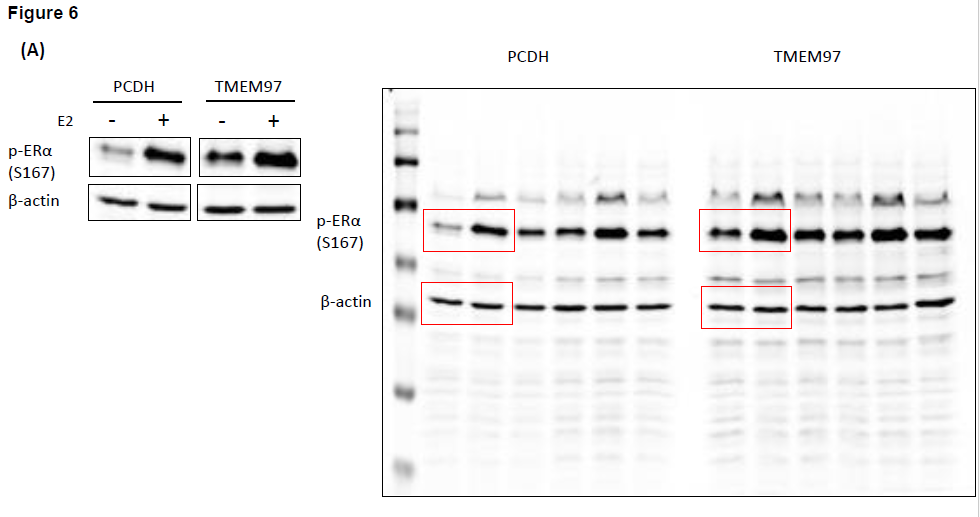


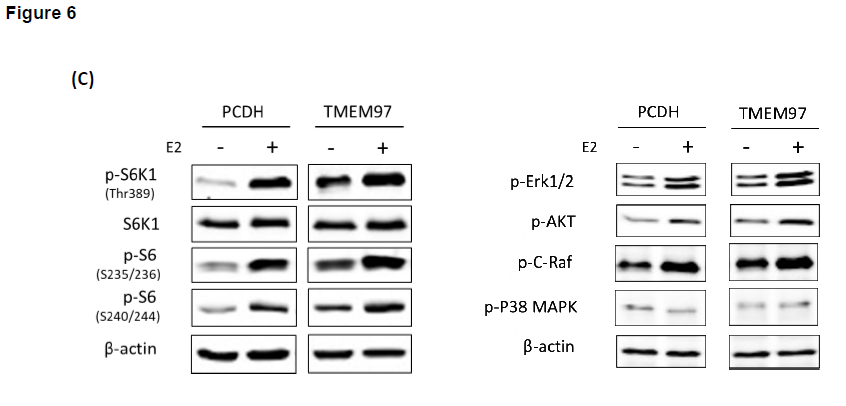


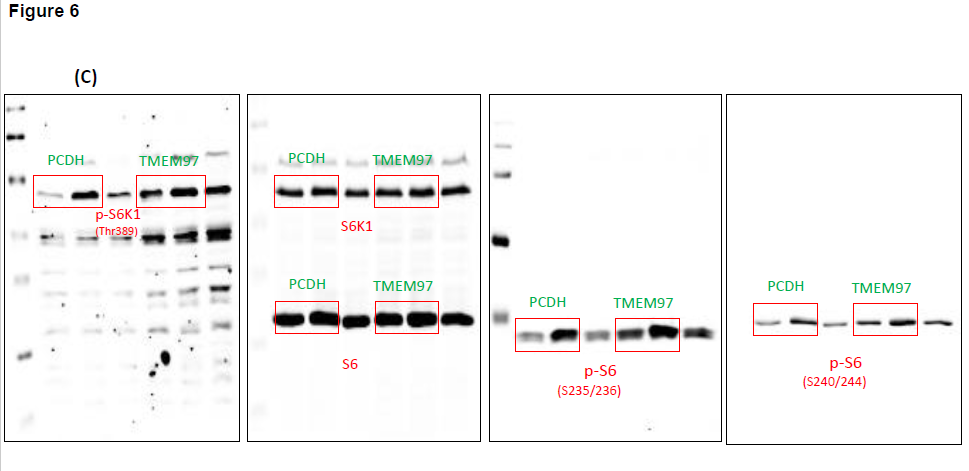


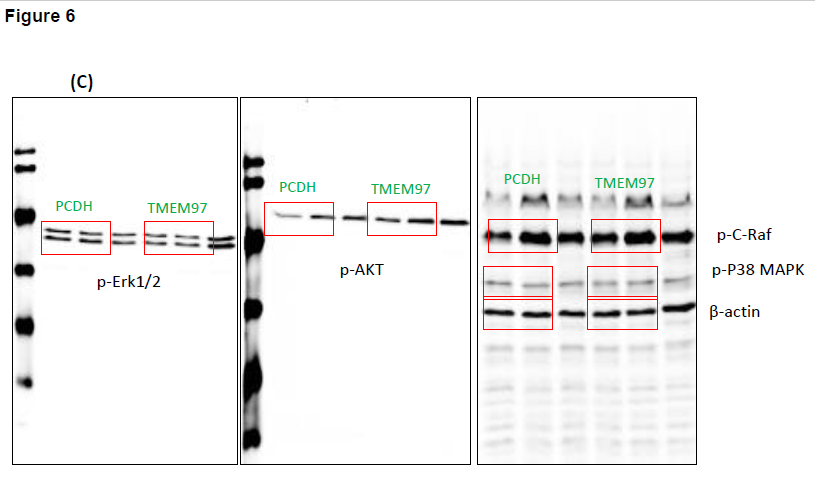


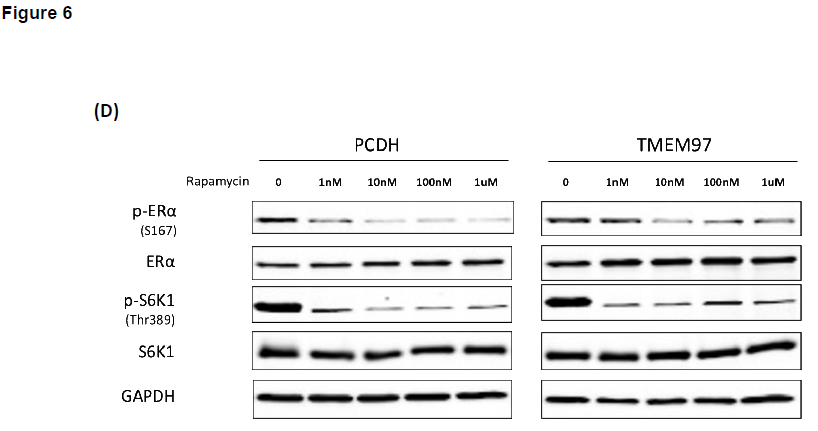


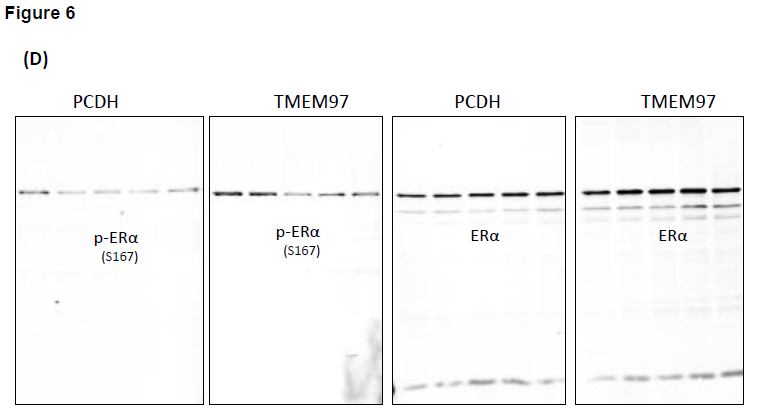


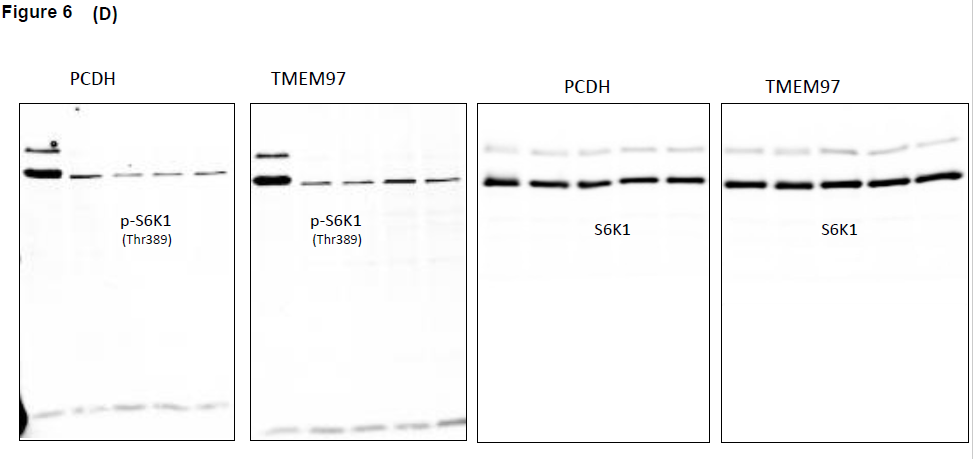


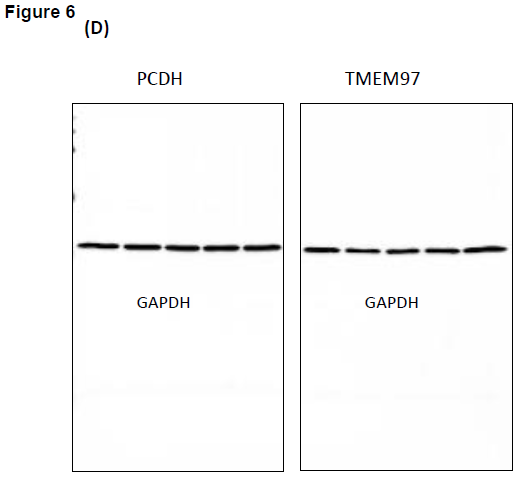


Original blots of Figure 6.


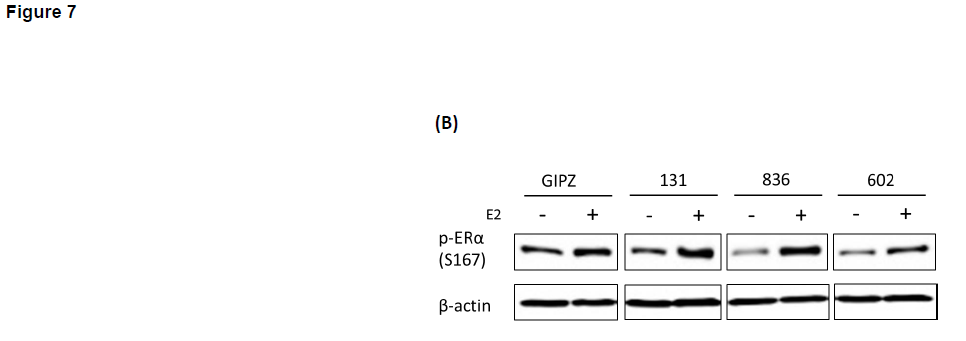


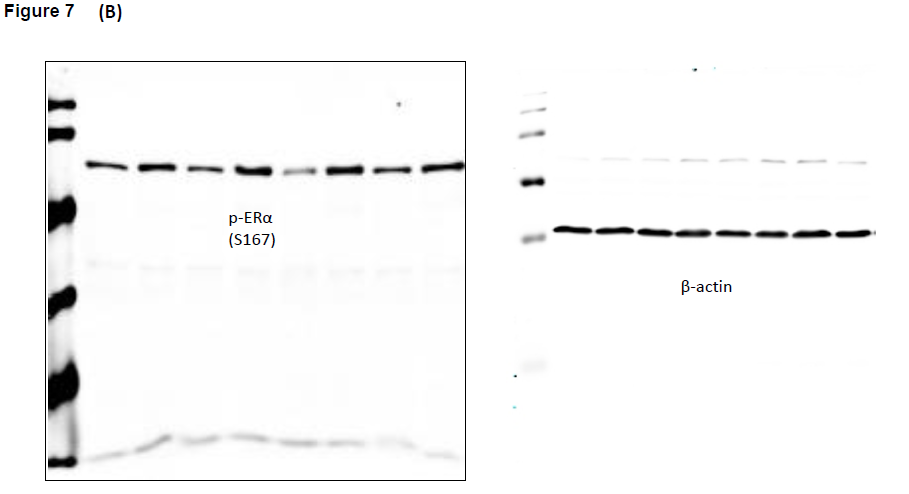


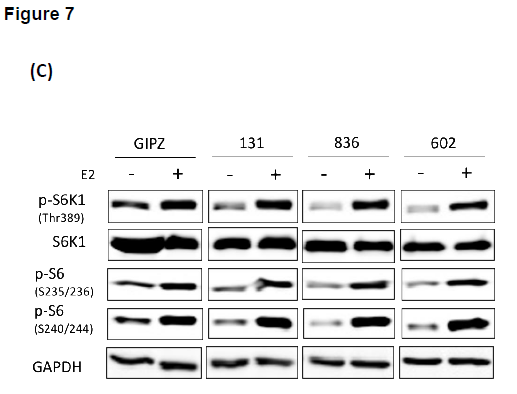


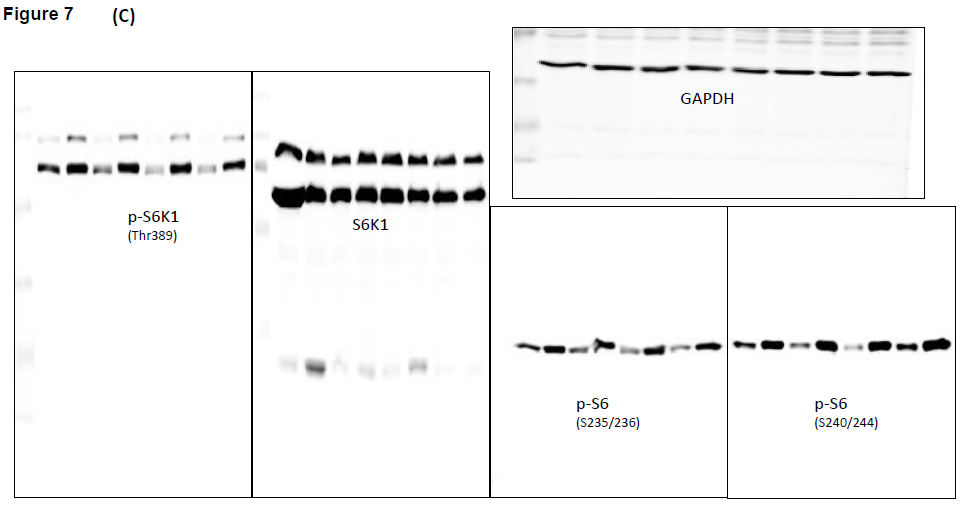


Original blots of Figure 7.
